# Supplementary material for: High-throughput screen identifies disulfiram as a potential therapeutic for triple-negative breast cancer cells: Interaction with IQ motif-containing factors
Source: PubMed Central journal article supplement — Cell Cycle. 2013 Aug 12;12(18):3013–24. doi: 10.4161/cc.26063 (PMC3875676; doi:10.4161/cc.26063), 2013-08-12
Supplement: cc-12-3013-s01.pdf [file cc-12-3013-s01.pdf]

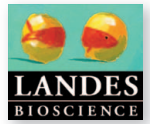

## **Supplemental Material to:**

**Tyler JW Robinson, Melody Pai, Jeff C Liu, Frederick Vizeacoumar, Thomas Sun, Sean E Egan, Alessandro Datti, Jing Huang, and Eldad Zacksenhaus**

**High-throughput screen identifies disulfiram as a potential therapeutic for triple-negative breast cancer cells: Interaction with IQ motif-containing factors**

**Cell Cycle 2013; 12(18)**

**<http://dx.doi.org/10.4161/cc.26063>**

**<http://www.landesbioscience.com/journals/cc/article/26063>**

Table S1. Top hits from screening the Spectrum library

| Spectrum Library                                         | HCC70 | MDA-MB-231 | MDA-MB-436 | Bt549 |
|----------------------------------------------------------|-------|------------|------------|-------|
| THIRAM                                                   | -0.4  | -0.6       | 0.3        | -1.1  |
| PYRITHIONE ZINC                                          | -0.7  | 0.4        | 0.8        | -0.3  |
| <b>DISULFIRAM</b>                                        | -0.4  | 0.5        | 1.3        | -0.2  |
| THIMEROSAL                                               | 0.3   | 0.3        | 0.9        | 0.7   |
| DACTINOMYCIN                                             | 1.0   | 16.4       | 20.8       | 4.5   |
| TOMATINE                                                 | 0.2   | 1.3        | 45.7       | 1.2   |
| MITOXANTHRONE HYDROCHLORIDE                              | 1.0   | 15.1       | 19.4       | 18.6  |
| TYROTHRIN                                                | 17.2  | 16.8       | 5.8        | 16.6  |
| PYRROMYCIN                                               | 3.3   | 11.3       | 40.2       | 8.6   |
| PRISTIMERIN                                              | 2.8   | 2.4        | 67.6       | 2.7   |
| CELASTROL                                                | 7.4   | 6.5        | 59.2       | 5.2   |
| OBTUSAQUINONE                                            | 1.9   | 4.9        | 75.3       | 2.2   |
| GRAMICIDIN                                               | 27.1  | 29.3       | 7.7        | 20.5  |
| TETRACHLOROISOPHTHALONITRILE                             | 0.2   | 0.0        | 84.0       | 0.9   |
| 1-BENZYLOXYCARBONYLAMINOPHENETHYL<br>CHLOROMETHYL KETONE | 4.0   | 7.7        | 71.9       | 8.7   |
| PHENYLMERCURIC ACETATE                                   | 1.0   | 95.2       | 1.0        | 0.8   |
| ACRIFLAVINIUM HYDROCHLORIDE                              | 25.2  | 24.6       | 22.4       | 28.1  |
| SANGUINARINE SULFATE                                     | 26.5  | 4.1        | 42.6       | 29.6  |
| ALEXIDINE HYDROCHLORIDE                                  | 57.4  | 16.8       | 6.7        | 31.6  |
| AKLAVINE HYDROCHLORIDE                                   | 27.3  | 25.2       | 47.2       | 27.1  |
| CHLORANIL                                                | 7.7   | 37.2       | 74.2       | 11.0  |
| CETRIMONIUM BROMIDE                                      | 15.4  | 22.2       | 71.9       | 21.2  |
| PUROMYCIN HYDROCHLORIDE                                  | 3.6   | 24.1       | 68.6       | 36.6  |
| GENTIAN VIOLET                                           | 18.6  | 23.9       | 79.2       | 14.1  |
| PERUVOSIDE                                               | 40.8  | 16.5       | 79.4       | 3.4   |
| OUABAIN                                                  | 41.4  | 13.9       | 82.4       | 2.9   |
| MITOMYCIN C                                              | 41.7  | 59.6       | 3.7        | 35.7  |
| CONVALLATOXIN                                            | 44.8  | 13.9       | 81.1       | 3.4   |
| COLCHICINE                                               | 13.9  | 24.0       | 90.1       | 17.3  |
| CYMARIN                                                  | 52.7  | 17.1       | 76.8       | 3.8   |
| NERIIFOLIN                                               | 44.0  | 18.1       | 82.2       | 6.6   |
| CAMPTOTHECIN                                             | 8.9   | 32.1       | 89.4       | 22.2  |
| DIGITOXIN                                                | 46.8  | 20.9       | 81.2       | 3.9   |
| BETA-PELTATIN                                            | 14.4  | 26.1       | 95.0       | 17.6  |
| GITOXIGENIN DIACETATE                                    | 39.9  | 36.9       | 67.4       | 9.2   |
| EMETINE                                                  | 25.0  | 11.5       | 94.3       | 23.0  |
| COLCHICEINE                                              | 16.2  | 23.5       | 92.3       | 22.7  |
| 10-HYDROXYCAMPTOTHECIN                                   | 10.0  | 37.3       | 91.5       | 21.5  |
| ANTIMYCIN A                                              | 23.1  | 28.4       | 74.9       | 38.6  |
| NOCODAZOLE                                               | 18.6  | 26.2       | 95.3       | 25.5  |
| PODOPHYLLOTOXIN ACETATE                                  | 22.0  | 25.7       | 95.6       | 22.6  |
| CYCLOHEXIMIDE                                            | 30.1  | 21.6       | 93.9       | 20.7  |
| DEOXSAPPANONE B 7,3'-DIMETHYL ETHER<br>ACETATE           | 23.9  | 35.7       | 76.6       | 30.3  |
| DIGOXIN                                                  | 55.1  | 27.8       | 80.1       | 6.8   |
| PACLITAXEL                                               | 15.0  | 28.8       | 99.9       | 26.6  |
| GUAIAZULENE                                              | 29.8  | 32.2       | 82.3       | 29.0  |
| DIHYDROGAMBOGIC ACID                                     | 0.9   | 107.4      | 63.1       | 1.9   |
| ROTENONE                                                 | 28.7  | 37.6       | 82.0       | 25.8  |
| NIGERICIN SODIUM                                         | 29.6  | 48.5       | 72.5       | 24.6  |
| PATULIN                                                  | 3.4   | 98.2       | 69.2       | 6.6   |

Table S2. Top hits from screening the Prestwick library

| Prestwick Library                          | HCC70 | MDA-MB-231 | MDA-MB-436 | Bt549 |
|--------------------------------------------|-------|------------|------------|-------|
| <b>DISULFIRAM</b>                          | 0.6   | 0.4        | 5.0        | 2.9   |
| COLCHICINE                                 | 17.0  | 17.4       | 4.9        | 35.2  |
| DAUNORUBICIN HYDROCHLORIDE                 | 26.4  | 18.3       | 13.3       | 18.6  |
| DOXORUBICIN HYDROCHLORIDE                  | 30.8  | 21.9       | 14.5       | 23.2  |
| MITOXANTRONE DIHYDROCHLORIDE               | 32.1  | 16.6       | 15.0       | 26.8  |
| EMETINE DIHYDROCHLORIDE                    | 1.8   | 7.8        | 69.9       | 21.3  |
| CEPHAELINE DIHYDROCHLORIDE<br>HEPTAHYDRATE | 1.4   | 6.1        | 66.4       | 37.0  |
| PUROMYCIN DIHYDROCHLORIDE                  | 3.4   | 18.5       | 67.1       | 29.0  |
| ANISOMYCIN                                 | 17.5  | 10.7       | 74.6       | 30.1  |
| MONENSIN SODIUM SALT                       | 28.4  | 8.7        | 70.1       | 28.8  |
| CAMPTOTHECINE (S,+)                        | 6.0   | 24.2       | 73.5       | 34.3  |
| PROSCILLARIDIN A                           | 22.4  | 18.1       | 82.5       | 22.0  |
| PODOPHYLLOTOXIN                            | 17.5  | 16.5       | 80.3       | 43.2  |
| SANGUINARINE                               | 39.4  | 4.8        | 85.9       | 28.8  |
| CHRYSENE-1,4-QUINONE                       | 5.5   | 10.2       | 72.1       | 72.0  |
| PARBENDAZOLE                               | 18.1  | 21.8       | 92.7       | 37.1  |
| PACLITAXEL                                 | 18.8  | 21.9       | 83.9       | 49.7  |
| MEBENDAZOLE                                | 19.8  | 26.9       | 85.7       | 43.3  |
| NICLOSAMIDE                                | 6.4   | 59.1       | 81.2       | 32.8  |
| RIBOSTAMYCIN SULFATE SALT                  | 66.9  | 40.7       | 29.0       | 44.6  |
| CYCLOHEXIMIDE                              | 35.2  | 24.9       | 73.2       | 48.0  |
| FENBENDAZOLE                               | 20.4  | 27.2       | 82.7       | 50.9  |
| NOCODAZOLE                                 | 19.1  | 22.1       | 88.9       | 54.9  |
| METHIAZOLE                                 | 25.8  | 27.7       | 77.7       | 56.4  |
| DIGOXIN                                    | 41.1  | 24.6       | 82.7       | 40.3  |
| CANTHARIDIN                                | 17.4  | 52.7       | 85.8       | 35.6  |
| ELLIPTICINE                                | 49.7  | 26.0       | 69.7       | 48.3  |
| ALBENDAZOLE                                | 24.0  | 38.1       | 83.1       | 52.6  |
| STROPHANTINE OCTAHYDRATE                   | 49.7  | 21.4       | 96.0       | 34.5  |
| CHLOROPYRAMINE<br>HYDROCHLORIDE            | 76.8  | 46.5       | 35.6       | 49.5  |
| METHYL BENZETHONIUM CHLORIDE               | 61.0  | 36.8       | 64.2       | 57.5  |
| BENZYL PENICILLIN SODIUM                   | 73.2  | 48.1       | 56.6       | 50.3  |
| RILUZOLE HYDROCHLORIDE                     | 96.5  | 50.3       | 34.4       | 49.7  |
| LASALOCID SODIUM SALT                      | 42.0  | 70.4       | 85.4       | 36.4  |
| DIGITOXIGENIN                              | 76.1  | 48.9       | 70.8       | 40.6  |
| PARTHENOLIDE                               | 53.9  | 39.9       | 80.8       | 69.7  |
| PIPERLONGUMINE                             | 44.7  | 56.2       | 72.7       | 76.7  |
| BROMPHENIRAMINE MALEATE                    | 40.8  | 40.8       | 92.4       | 77.1  |
| CHELIDONINE MONOHYDRATE (+)                | 55.2  | 42.1       | 89.9       | 66.3  |
| (S)-PROPRANOLOL HYDROCHLORIDE              | 80.2  | 85.6       | 85.5       | 3.6   |
| THIOSTREPTON                               | 73.9  | 94.8       | 20.1       | 67.5  |
| THIETHYLPERAZINE MALATE                    | 75.2  | 16.0       | 89.8       | 80.2  |
| NALBUPHINE HYDROCHLORIDE                   | 80.1  | 58.8       | 51.1       | 73.1  |
| MECLOCYCLINE SULFOSALICYLATE               | 85.5  | 81.4       | 25.9       | 71.8  |
| DIPHENHYDRAMINE<br>HYDROCHLORIDE           | 73.9  | 49.5       | 77.4       | 64.1  |
| LETROZOLE                                  | 76.6  | 48.7       | 80.9       | 61.2  |
| DOXYCYCLINE HYDROCHLORIDE                  | 83.6  | 86.7       | 27.3       | 70.2  |
| LANATOSIDE C                               | 81.7  | 46.4       | 86.6       | 53.8  |
| DEMECLOCYCLINE HYDROCHLORIDE               | 84.2  | 87.7       | 25.3       | 71.5  |
| SKIMMIANINE                                | 23.5  | 83.7       | 87.7       | 74.6  |

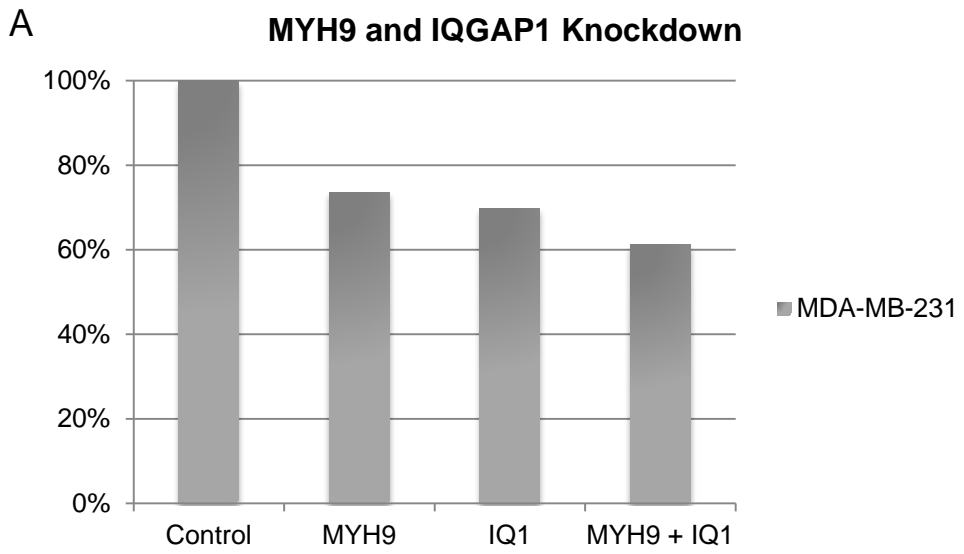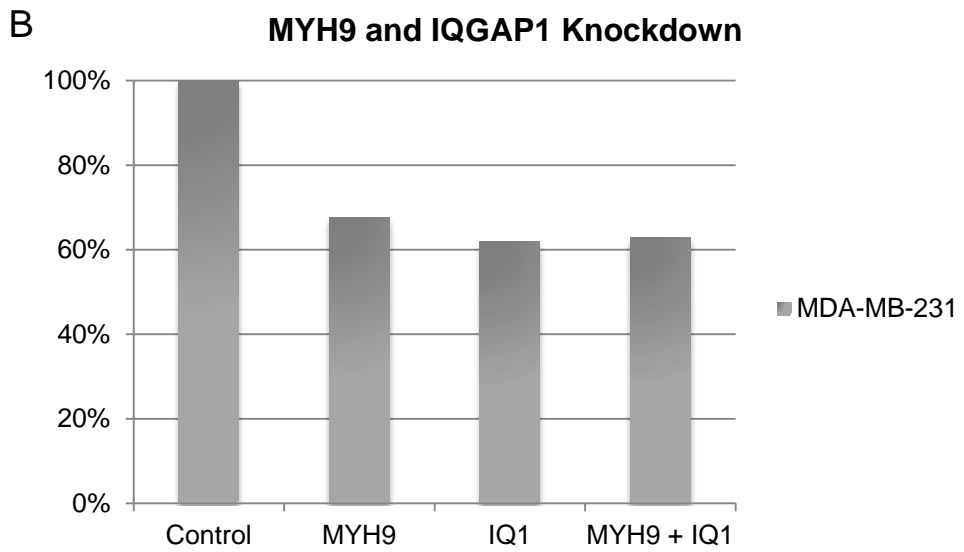

Figure S1

**A** MDA231: Disulfiram and Gemcitabine

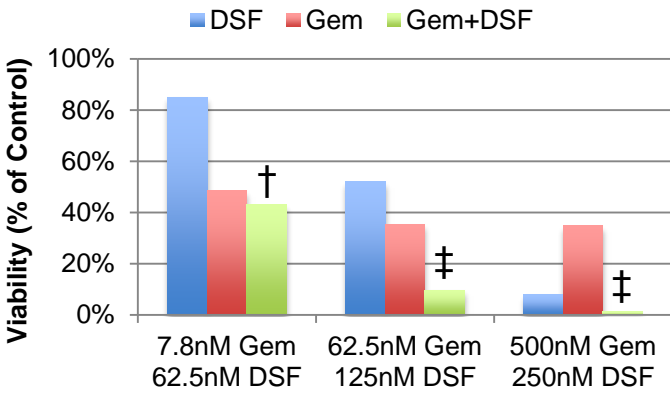

**B** MDA231: Disulfiram and Paclitaxel

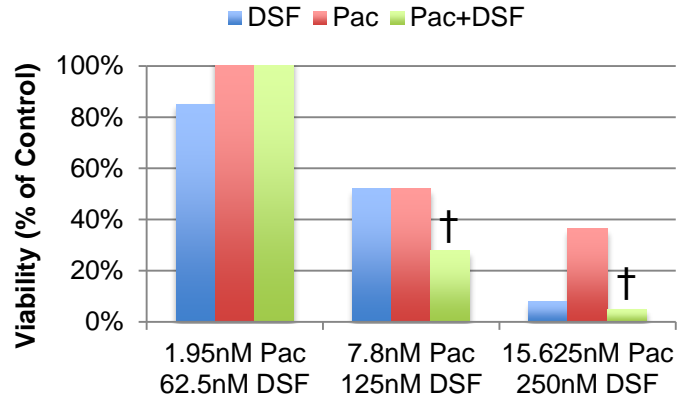

**C** MDA231: Disulfiram and PD

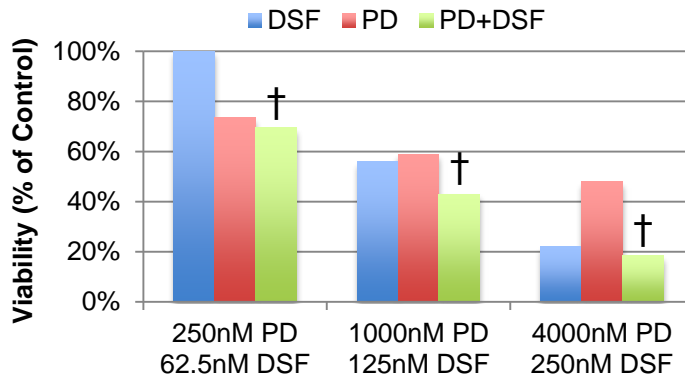

Figure S2

**LEGENDS TO SUPPLEMENTARY FIGURES**

Figure S1. Effect of IQGAP1 plus MYH9 knockdown on growth of MDA-MB-231 cells. Shown are two experiments in which IQGAP1 and MYH9 are knocked down alone or together followed by MTT assay. In different experiments, IQGAP1 plus MYH9 knockdown moderately decreased cell viability (A) or had no effect (B) compared to knockdown with either siRNA alone.

Figure S2. Effect of combination treatment with disulfiram (DSF) and either gemcitabine, paclitaxel or PD-0332991. MDA-MB-231 cells were treated with (A) DSF and gemcitabine alone or in combination and analyzed by MTT viability assay. (B) DSF and paclitaxel. (C) DSF and PD-0332991. All values represent % of untreated control. † denotes additive effect, ‡ denotes synergistic effect (See METHODS).
